# Supplementary material for: WNT-1 inducible signaling pathway protein-1 enhances growth and tumorigenesis in human breast cancer
Source: PubMed Central journal article supplement (PMC4346832; doi:10.1038/srep08686), 2015-03-03
Supplement: srep08686-s1.pdf [file srep08686-s1.pdf]

**WNT-1 inducible signaling pathway protein 1 enhances growth and tumorigenesis in human breast cancer**

Kun-Chun Chiang<sup>1,#</sup>, Chun-Nan Yeh<sup>2#</sup>, Li-Chuan Chung<sup>3</sup>, Tsui-Hsia Feng<sup>4</sup>, Chi-Chin Sun<sup>5</sup>, Miin-Fu Chen<sup>2</sup>, Yi-Yin Jan<sup>2</sup>, Ta-Sen Yeh<sup>2\*</sup>, Shin-Cheh Chen<sup>2\*</sup>, Horng-Heng Juang<sup>3\*</sup>

<sup>1</sup>General Surgery Department, Chang Gung Memorial Hospital and Chang Gung University, 222, Mai-Chin Road, Keelung, Taiwan, 204, R.O.C

<sup>2</sup>General Surgery Department, Chang Gung Memorial Hospital and Chang Gung University, 5, Fu-Hsing Street, Kwei-Shan, Taoyuan, Taiwan, 333, R.O.C

<sup>3</sup>Department of Anatomy, School of Medicine, Chang Gung University, 259 Wen-Hwa 1st Road, Kwei-Shan Tao-Yuan, Taiwan, 333, R.O.C.

<sup>4</sup>Department of Nursing, School of Medicine, Chang Gung University, 259 Wen-Hwa 1st Road, Kwei-Shan Tao-Yuan, Taiwan, 333, R.O.C.

<sup>5</sup>Department of Ophthalmology, Chang Gung Memorial Hospital, 222, Mai-Chin Road, Keelung, Taiwan, 204, R.O.C

# co-first authors

\* co-corresponding authors

Supplemental Figure 1

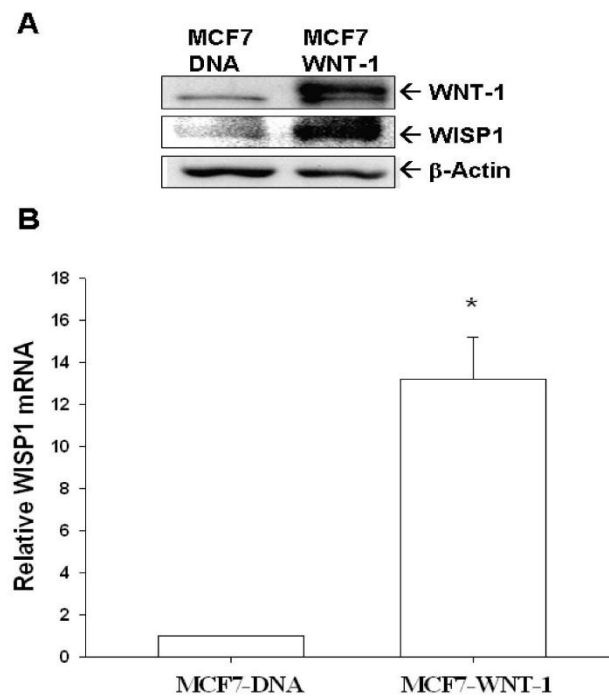

**Figure Suppl. 1. WISP1 is WNT1 downstream genes in MCF-7 cells.** Expressions of WISP1 and WNT-1 in MCF-7 cells stably transfected with pcDNA3zeoWNT-1 (MCF7-WNT-1) or pcDNA3.1zeo (MCF7-DNA) expression vectors were determined by immunoblotting (A) or RT-qPCR (B).

Supplemental Table: Antibodies information used in this experiment

| Antibodies       | Brand                                                |
|------------------|------------------------------------------------------|
| Cyclin A         | C-19, Santa Cruz Biotechnology                       |
| Cyclin B1        | D-11, Santa Cruz Biotechnology                       |
| Cyclin E         | 13A3, Santa Cruz Biotechnology                       |
| Cyclin D1        | DCS6, Cell Signaling, MA, USA                        |
| WISP1            | SC-8864, Santa Cruz Biotechnology                    |
| BTG2             | Tsui et al., 2008*                                   |
| P21              | DCS60, Cell Signaling                                |
| P27              | SX53G8.5, Cell Signaling                             |
| NDRG1            | 42-6200; Invitrogen                                  |
| E-cadherin       | ab53033, Abcam, Cambridge, MA                        |
| N-cadherin       | AJ1526a , Abgent, San Diego, CA                      |
| Snail            | sc-28199,Santa Cruz Biotechnology,<br>Santa Cruz, CA |
| Slug             | sc-10436,Santa Cruz Biotechnology,<br>Santa Cruz, CA |
| Twist            | sc-15393,Santa Cruz Biotechnology,<br>Santa Cruz, CA |
| $\beta$ -catenin | ab19022,Millipore, Billerica, MA                     |

\*Tsui KH, Hsieh WC, Lin MH, Chang PL, Juang HH. Triiodothyronine Modulates cell proliferation of human prostatic carcinoma cells by downregulation of the b-cell translocation gene 2. 2008; The Prostate 68: 610-619.
